# Supplementary material
Source: MDPI journal article supplement (https://www.mdpi.com/2073-4395/14/5/987)
Supplement: s1 [file s1 › agronomy-2952083-supplementary.pdf]

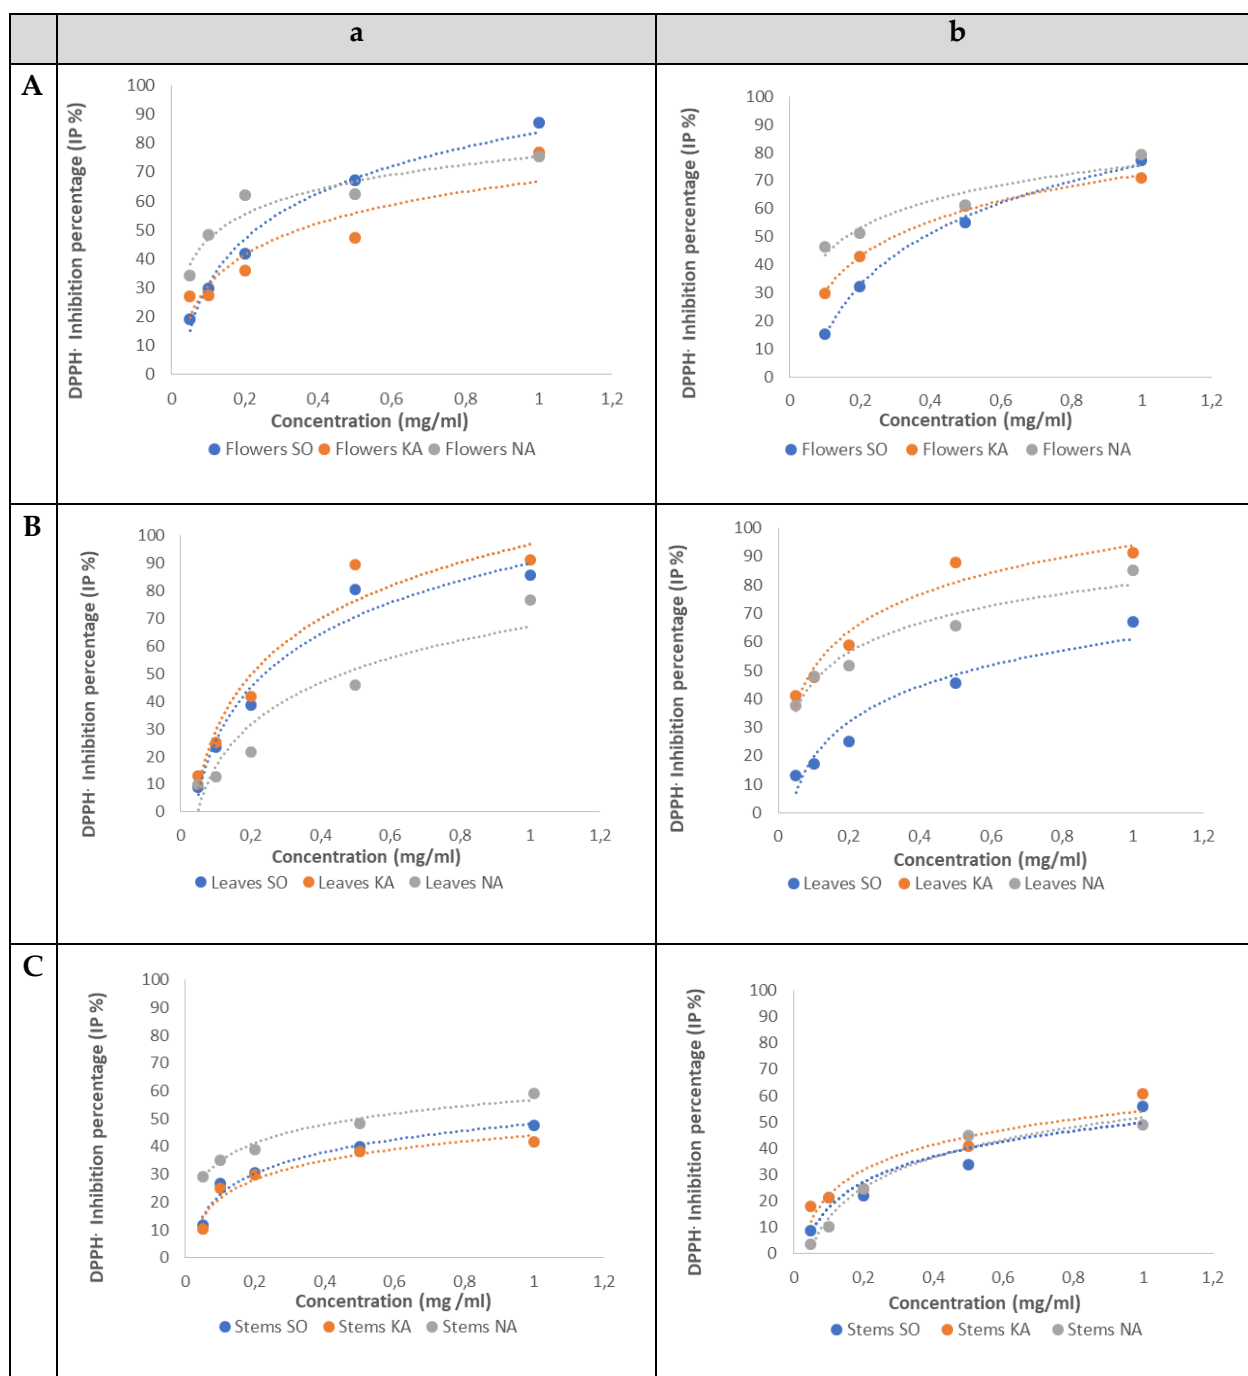

**Figure S1.** Comparative analysis of antioxidant activity (DPPH<sup>•</sup>) in aqueous extracts of *O. nervosum* ssp. *platylepis* (A: flowers, B: leaves, C: stems), from both spontaneous (a) and cultivated (b) thistle.

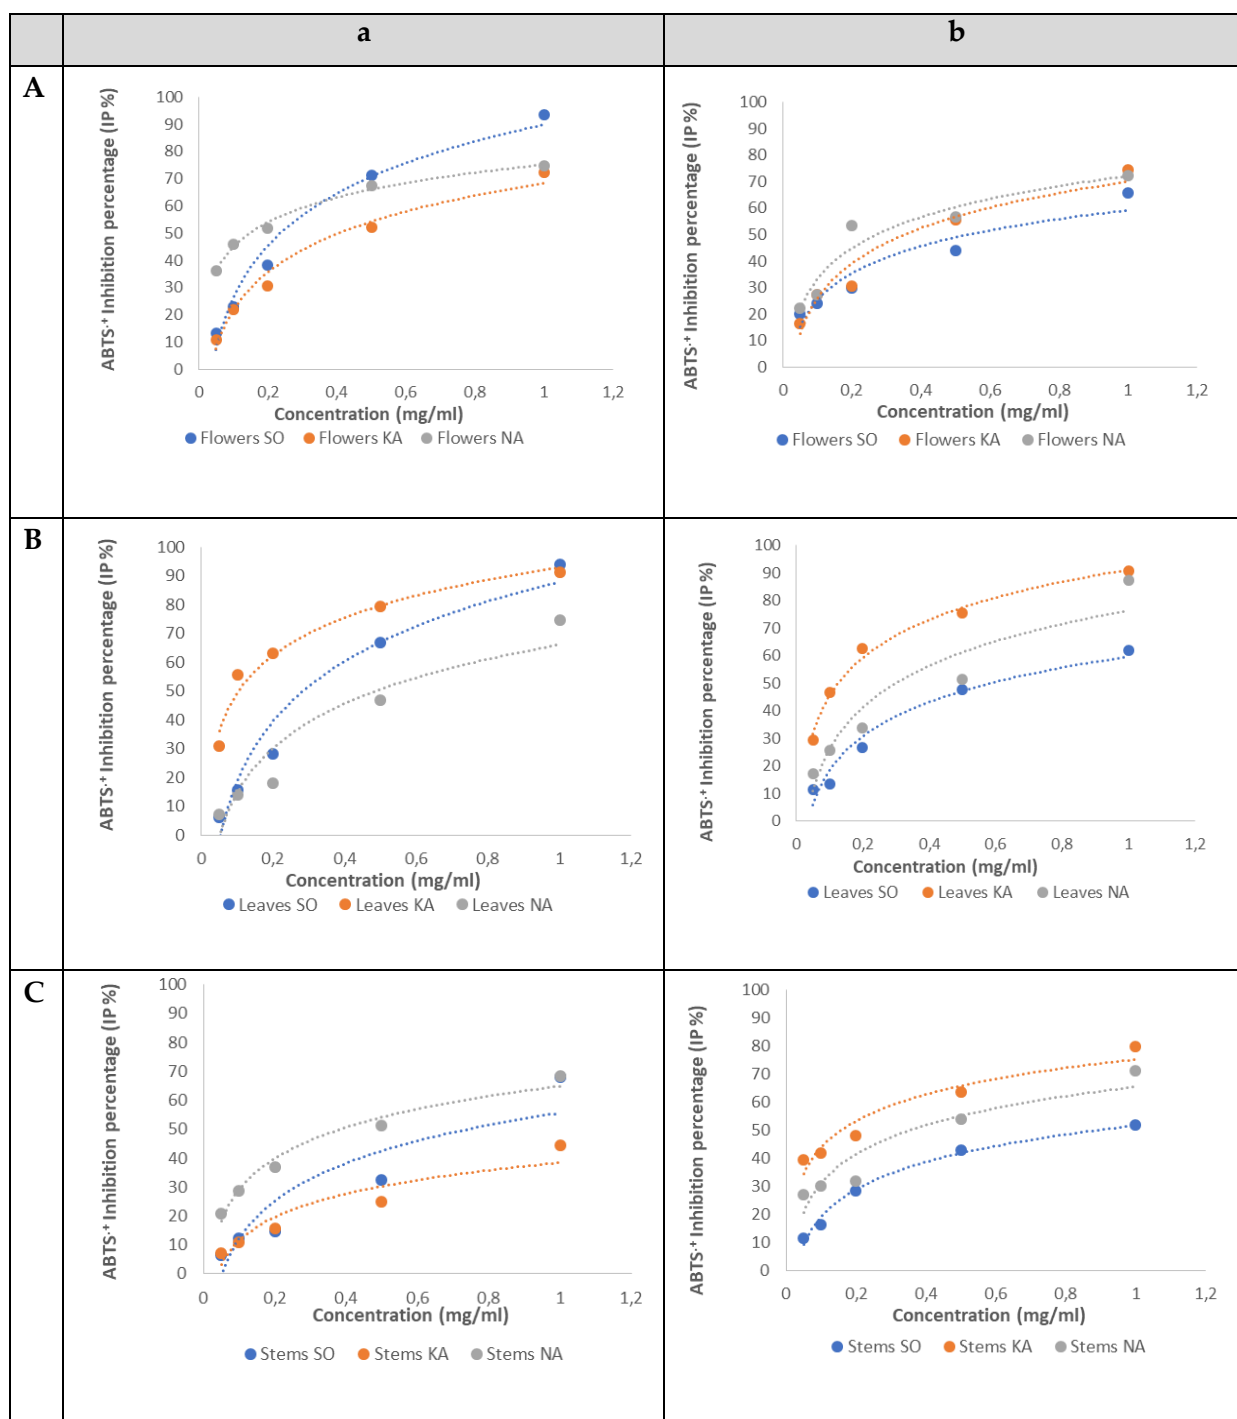

**Figure S2.** Comparative analysis of antioxidant activity (ABTS<sup>+</sup>) in aqueous extracts of *O. nervosum* ssp. *platylepis* (A: flowers, B: leaves, C: stems) from both spontaneous (a) and cultivated thistle (b).
